# Supplementary material for: Antifungal compounds from Streptomyces associated with attine ants also inhibit Leishmania donovani
Source: PubMed Central journal article supplement (PMC6695191; doi:10.1371/journal.pntd.0007643), 2019-08-05

**S1 Fig.** Antagonist activity of fractions (2  $\mu$ L of 50  $\mu$ g) **A4** and **A5** (Containing compounds **1-3**) and **B3+B4** (Containing compound **4**) against *Escovopsis*

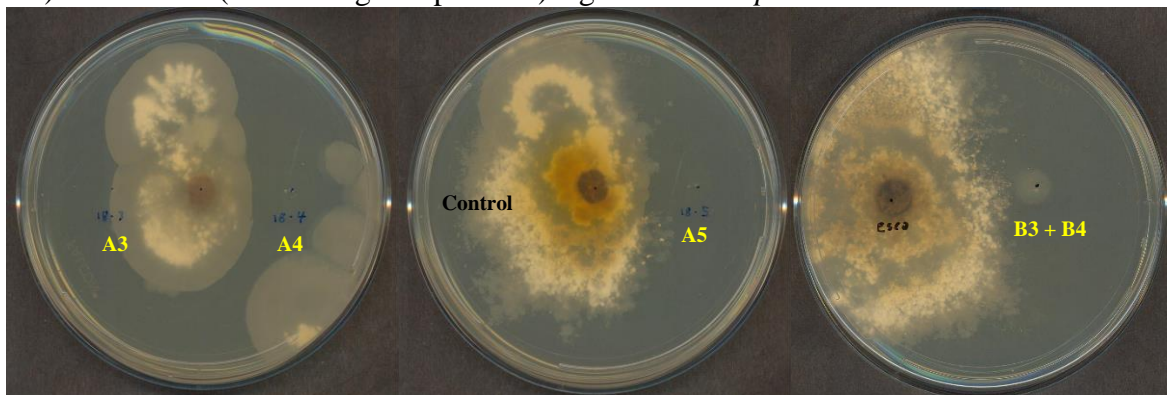

Supplement: pntd.0007643.s001.pdf [file pntd.0007643.s001.pdf]
