# Supplementary material for: Antifungal compounds from Streptomyces associated with attine ants also inhibit Leishmania donovani
Source: PubMed Central journal article supplement (PMC6695191; doi:10.1371/journal.pntd.0007643), 2019-08-05

S2 Fig. <sup>1</sup>H NMR of mer-A2026B (1) (CDCl<sub>3</sub>, 500 MHz)

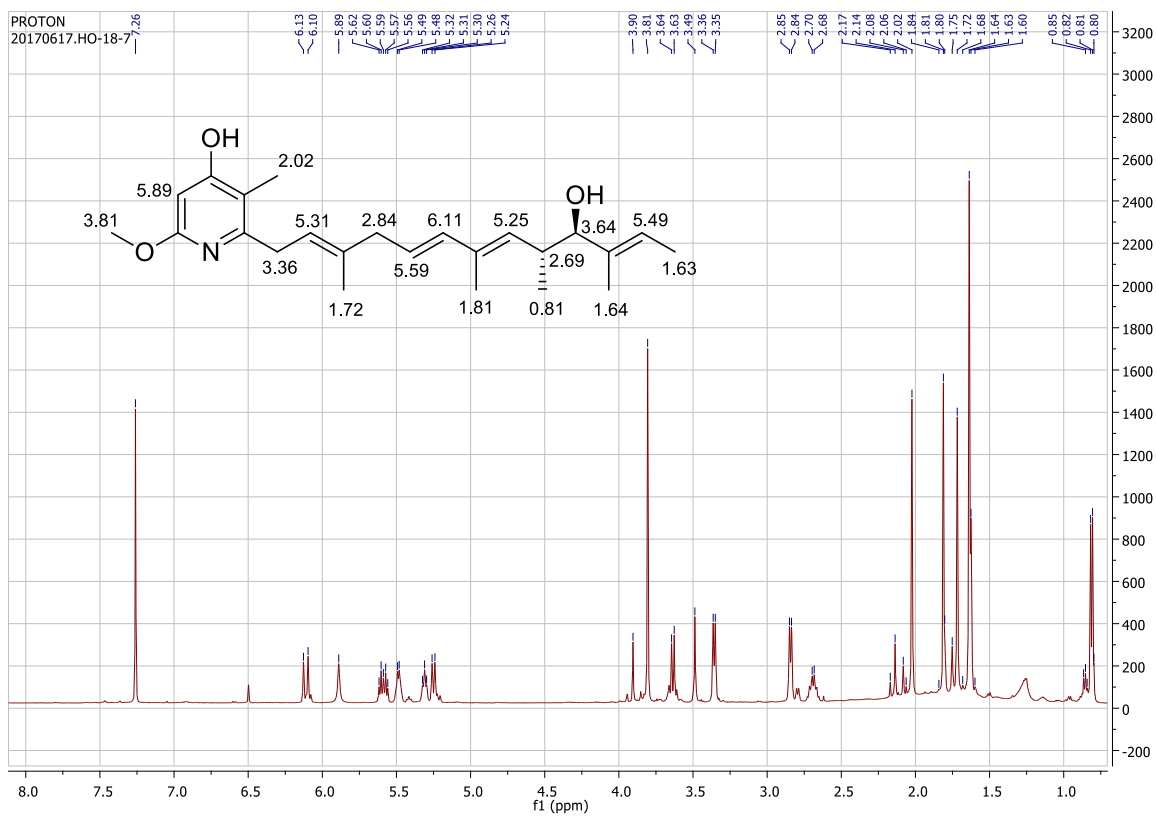

Supplement: pntd.0007643.s002.pdf [file pntd.0007643.s002.pdf]
