# Supplementary material for: Antifungal compounds from Streptomyces associated with attine ants also inhibit Leishmania donovani
Source: PubMed Central journal article supplement (PMC6695191; doi:10.1371/journal.pntd.0007643), 2019-08-05
Supplement: pntd.0007643.s003.pdf [file pntd.0007643.s003.pdf]

### S3 Fig. HRESIMS of mer-A2026B (1)

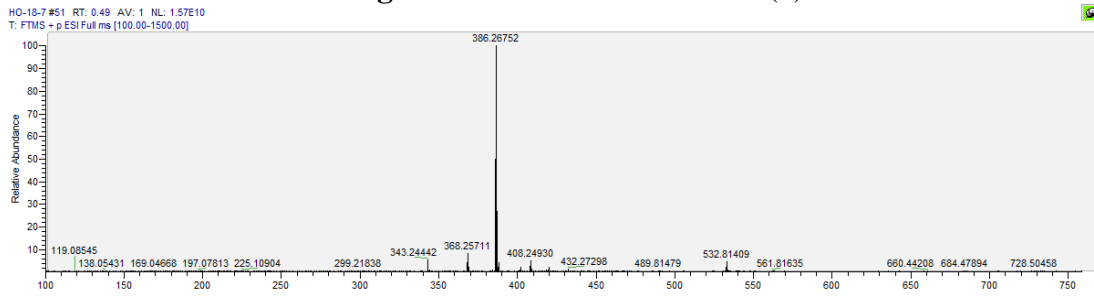

| #  | Formula                                                       | m/z       | err [ppm] | err [mDa] | c |
|----|---------------------------------------------------------------|-----------|-----------|-----------|---|
| 1  | C <sub>20</sub> H <sub>32</sub> N <sub>7</sub> O              | 386.26629 | -3.2      | -1.2      |   |
| 2  | C <sub>21</sub> H <sub>38</sub> O <sub>6</sub>                | 386.26629 | -3.2      | -1.2      |   |
| 3  | C <sub>5</sub> H <sub>28</sub> N <sub>19</sub> O <sub>2</sub> | 386.26679 | -1.9      | -0.7      |   |
| 4  | C <sub>6</sub> H <sub>34</sub> N <sub>12</sub> O <sub>7</sub> | 386.26679 | -1.9      | -0.7      |   |
| 5  | C <sub>7</sub> H <sub>40</sub> N <sub>5</sub> O <sub>12</sub> | 386.26680 | -1.9      | -0.7      |   |
| 6  | C <sub>22</sub> H <sub>34</sub> N <sub>4</sub> O <sub>2</sub> | 386.26763 | 0.3       | 0.1       |   |
| 7  | C <sub>7</sub> H <sub>30</sub> N <sub>16</sub> O <sub>3</sub> | 386.26813 | 1.6       | 0.6       |   |
| 8  | C <sub>8</sub> H <sub>36</sub> N <sub>9</sub> O <sub>8</sub>  | 386.26814 | 1.6       | 0.6       |   |
| 9  | C <sub>9</sub> H <sub>42</sub> N <sub>2</sub> O <sub>13</sub> | 386.26814 | 1.6       | 0.6       |   |
| 10 | C <sub>24</sub> H <sub>36</sub> N <sub>3</sub>                | 386.26897 | 3.8       | 1.5       |   |
