# Supplementary material for: Antifungal compounds from Streptomyces associated with attine ants also inhibit Leishmania donovani
Source: PubMed Central journal article supplement (PMC6695191; doi:10.1371/journal.pntd.0007643), 2019-08-05

S5 Fig. <sup>13</sup>C NMR of piericidin-A<sub>1</sub> (2) (CDCl<sub>3</sub>, 125 MHz)

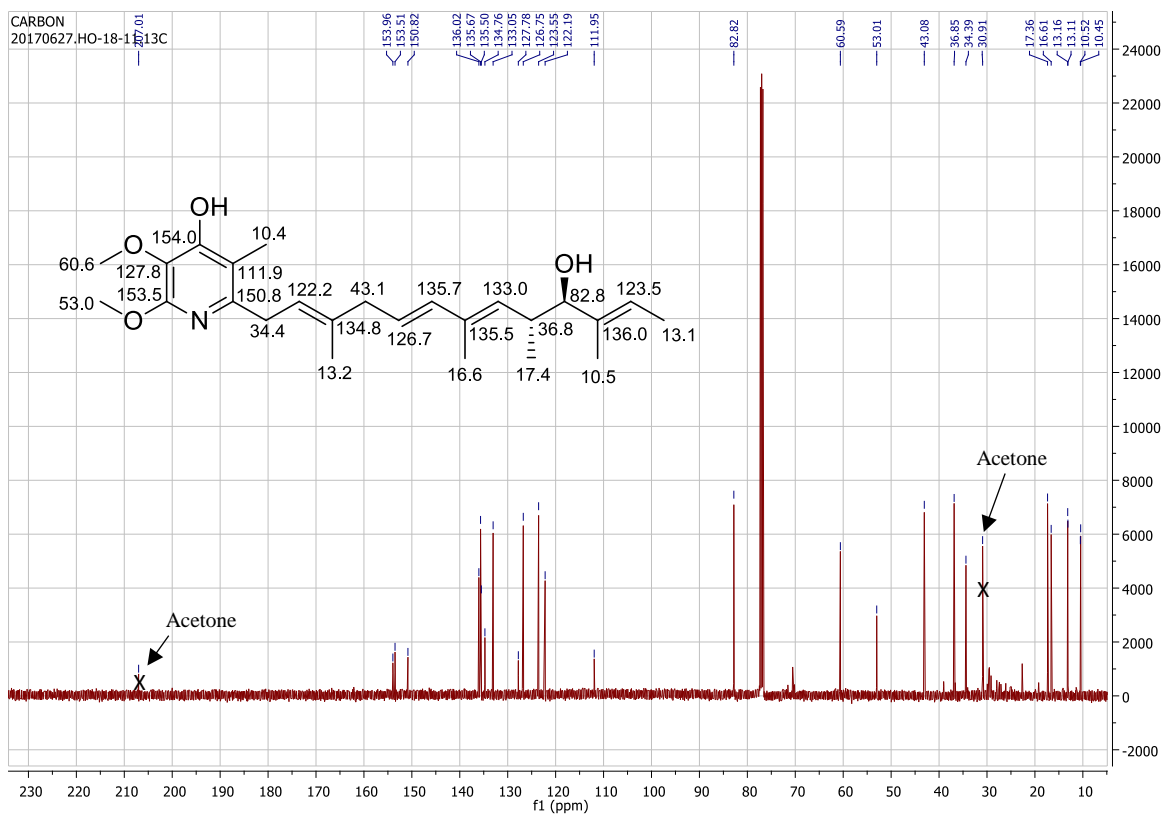

Supplement: pntd.0007643.s005.pdf [file pntd.0007643.s005.pdf]
