# Supplementary material for: Antifungal compounds from Streptomyces associated with attine ants also inhibit Leishmania donovani
Source: PubMed Central journal article supplement (PMC6695191; doi:10.1371/journal.pntd.0007643), 2019-08-05

**S6 Fig. HRESIMS of piericidin-A1 (2)**

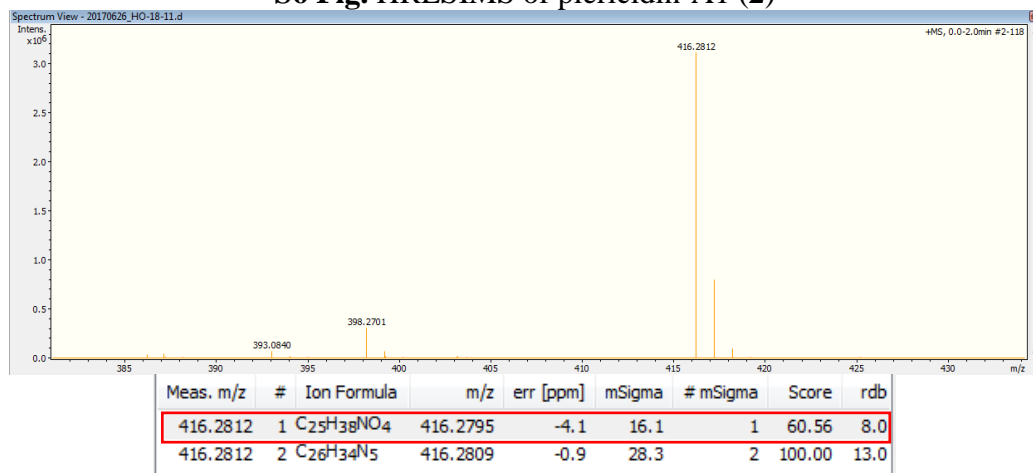

Supplement: pntd.0007643.s006.pdf [file pntd.0007643.s006.pdf]
