# Supplementary material for: Antifungal compounds from Streptomyces associated with attine ants also inhibit Leishmania donovani
Source: PubMed Central journal article supplement (PMC6695191; doi:10.1371/journal.pntd.0007643), 2019-08-05

**S9 Fig.**  $^{13}\text{C}$  NMR of nigericin (**3**) ( $\text{CDCl}_3$ , 125 MHz). Region of 10 to 46 ppm.

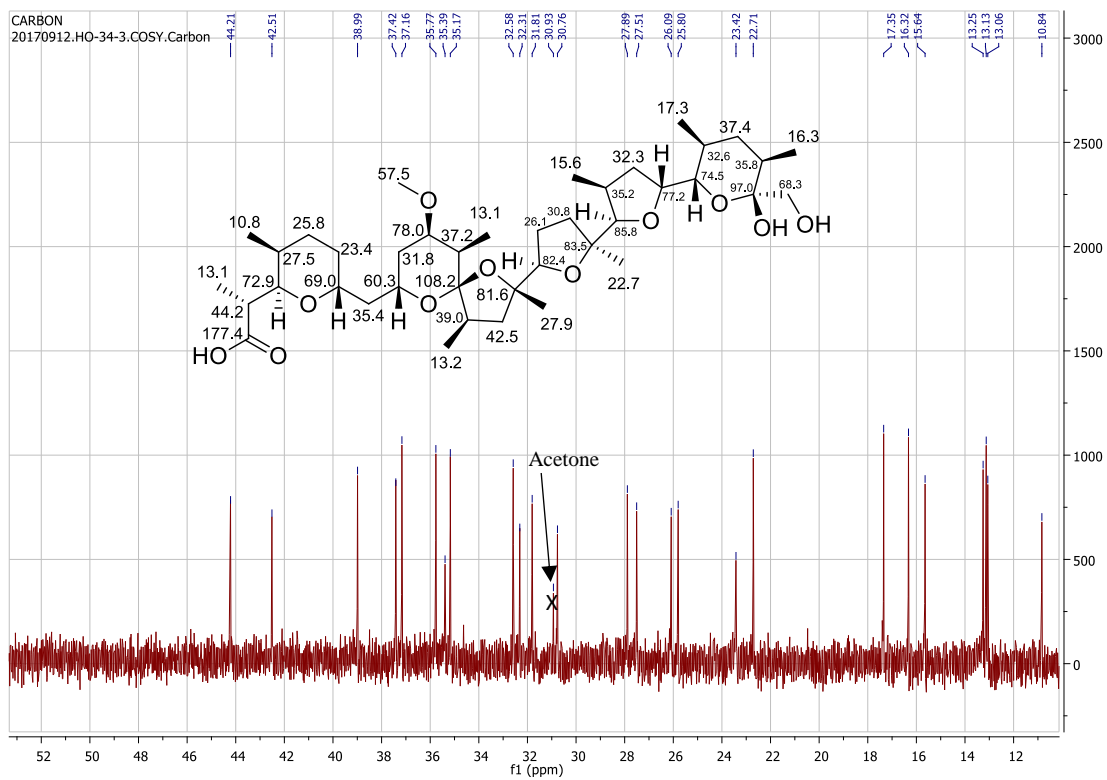

Supplement: pntd.0007643.s009.pdf [file pntd.0007643.s009.pdf]
