# Supplementary material for: Antifungal compounds from Streptomyces associated with attine ants also inhibit Leishmania donovani
Source: PubMed Central journal article supplement (PMC6695191; doi:10.1371/journal.pntd.0007643), 2019-08-05

S11 Fig. HRESIMS of nigericin (3)

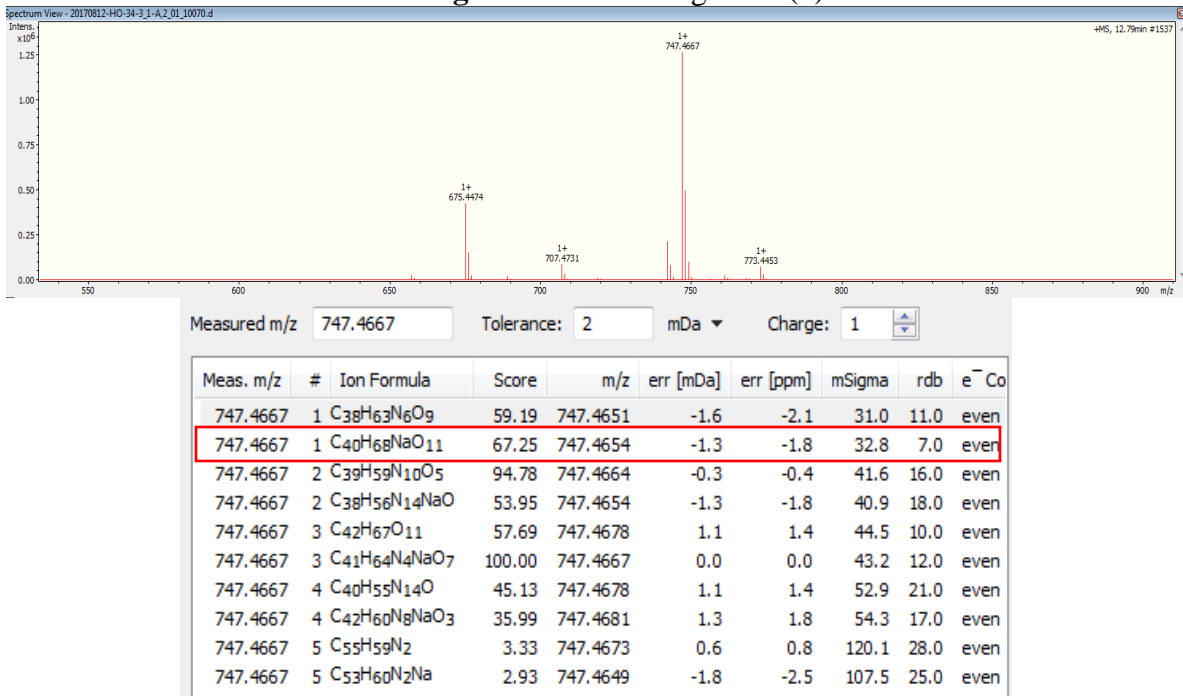

Supplement: pntd.0007643.s011.pdf [file pntd.0007643.s011.pdf]
