# Supplementary material for: Antifungal compounds from Streptomyces associated with attine ants also inhibit Leishmania donovani
Source: PubMed Central journal article supplement (PMC6695191; doi:10.1371/journal.pntd.0007643), 2019-08-05

**S12 Fig.**  $^1\text{H}$  NMR of dinactin (**4**) ( $\text{CDCl}_3$ , 500 MHz)

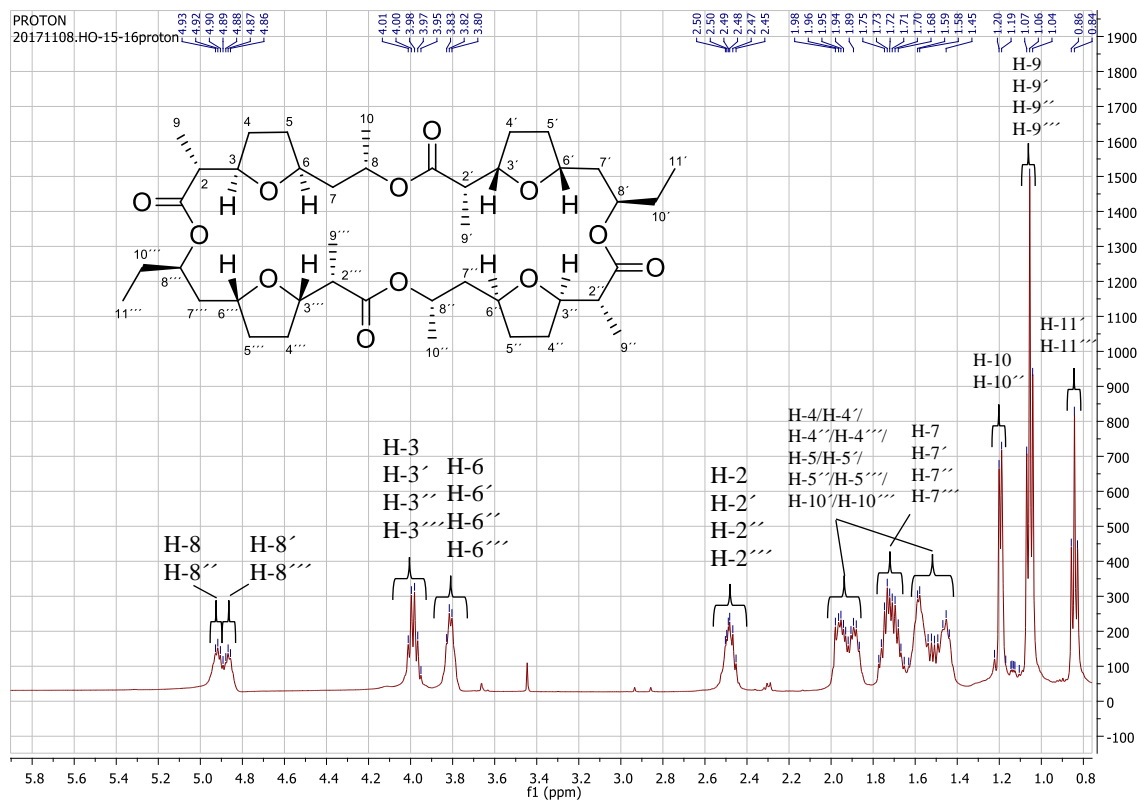

Supplement: pntd.0007643.s012.pdf [file pntd.0007643.s012.pdf]
