# Supplementary material for: Antifungal compounds from Streptomyces associated with attine ants also inhibit Leishmania donovani
Source: PubMed Central journal article supplement (PMC6695191; doi:10.1371/journal.pntd.0007643), 2019-08-05

**S16 Fig.** Antagonist activity of compounds (100  $\mu$ g) against *Escovopsis* sp ICBG740 (21 days of growth at 28 °C): A) Mer-A2026B (1), B) piericidin-A<sub>1</sub> (2), C) nigericin (3), D) dinactin (4), E) Miconazole, and F) Negative control

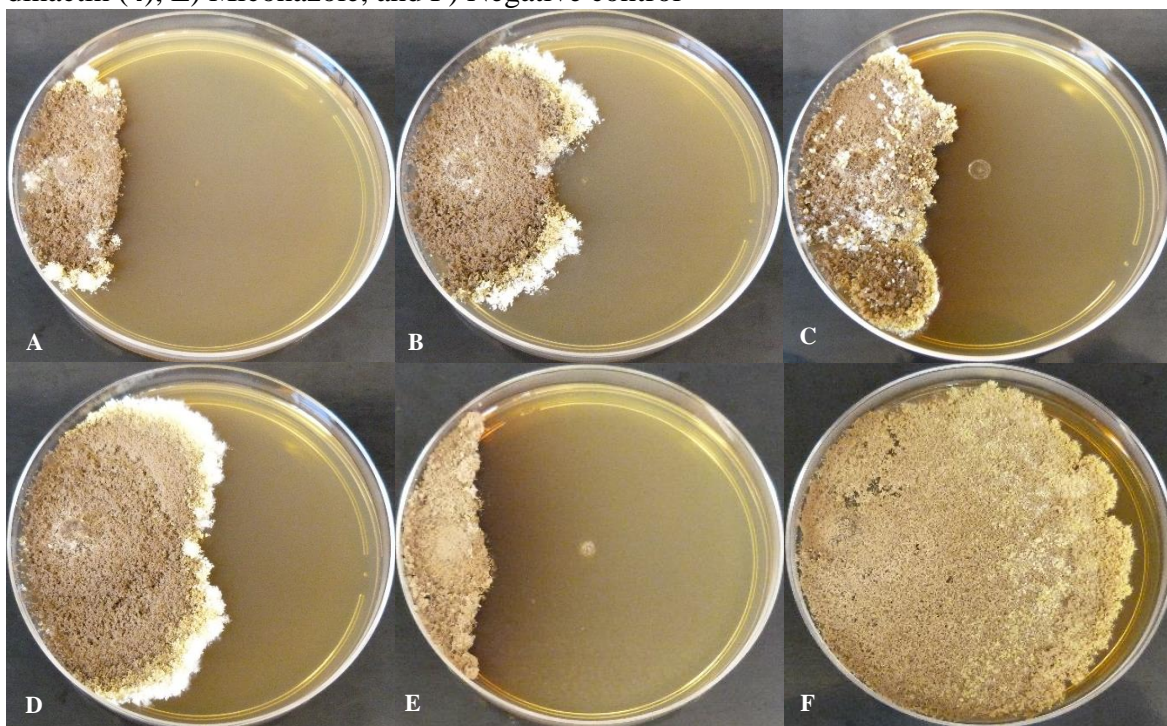

Supplement: pntd.0007643.s016.pdf [file pntd.0007643.s016.pdf]
