# Supplementary material for: Antifungal compounds from Streptomyces associated with attine ants also inhibit Leishmania donovani
Source: PubMed Central journal article supplement (PMC6695191; doi:10.1371/journal.pntd.0007643), 2019-08-05

**S19 Fig.** MS/MS spectra of compound eluted at 32.7 minutes ( $m/z$  386.40), identified as mer-A2026B (positive mode)

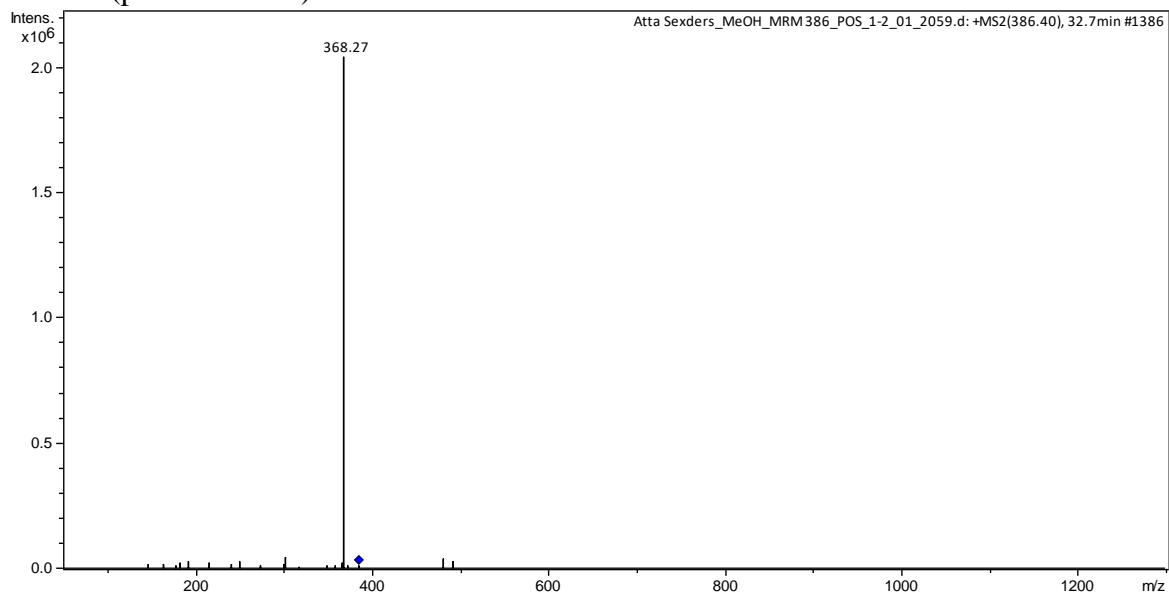

Supplement: pntd.0007643.s019.pdf [file pntd.0007643.s019.pdf]
