# Supplementary material for: Antifungal compounds from Streptomyces associated with attine ants also inhibit Leishmania donovani
Source: PubMed Central journal article supplement (PMC6695191; doi:10.1371/journal.pntd.0007643), 2019-08-05

**S20 Fig.** MS/MS spectra of mer-A2026B (positive mode)

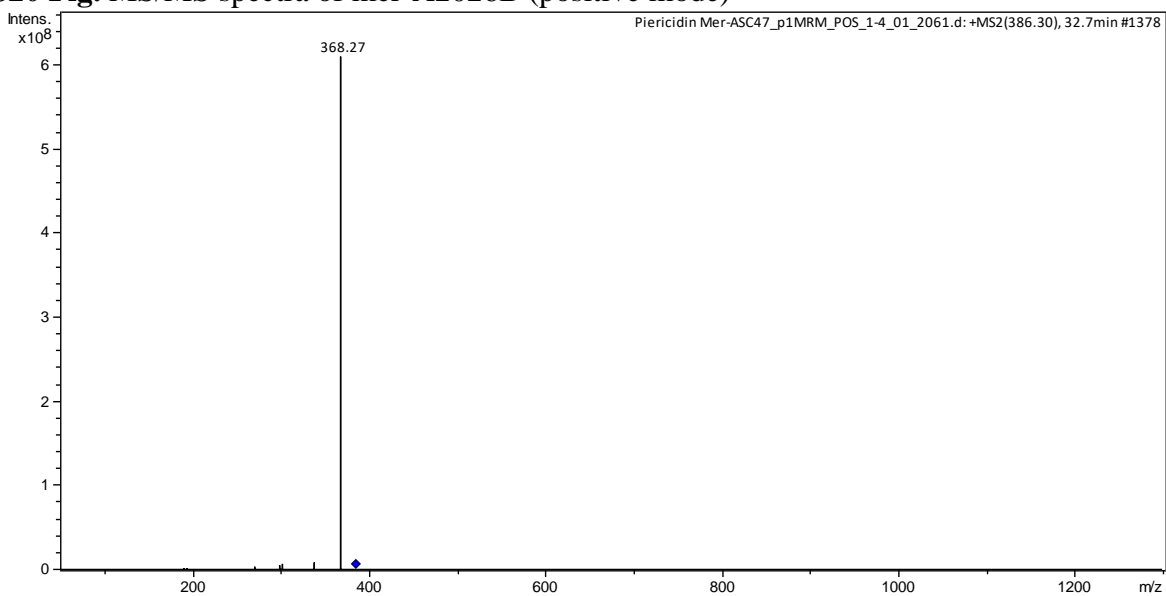

Supplement: pntd.0007643.s020.pdf [file pntd.0007643.s020.pdf]
