# Supplementary material for: Antifungal compounds from Streptomyces associated with attine ants also inhibit Leishmania donovani
Source: PubMed Central journal article supplement (PMC6695191; doi:10.1371/journal.pntd.0007643), 2019-08-05

**S21 Fig.** LC-HRESIMS of *Atta sexdens* methanolic extract (MRM  $m/z$  416.30, positive mode)

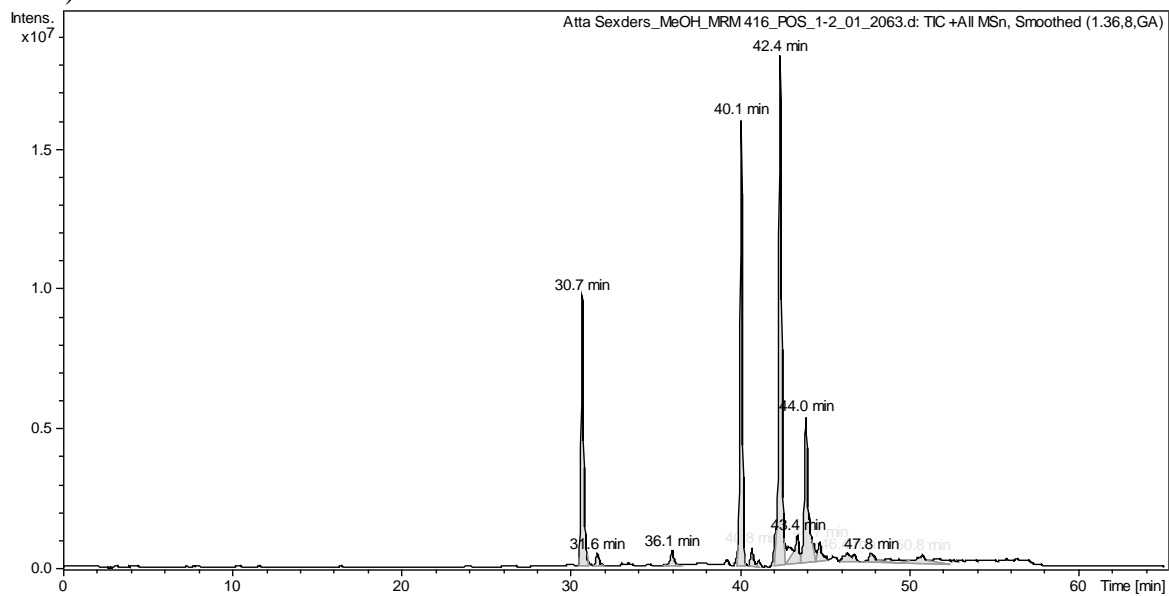

Supplement: pntd.0007643.s021.pdf [file pntd.0007643.s021.pdf]
