# Supplementary material for: Antifungal compounds from Streptomyces associated with attine ants also inhibit Leishmania donovani
Source: PubMed Central journal article supplement (PMC6695191; doi:10.1371/journal.pntd.0007643), 2019-08-05

**S22 Fig.** MS/MS spectra of compound eluted at 40.1 minutes ( $m/z$  416.30), identified as piericidin A (positive mode)

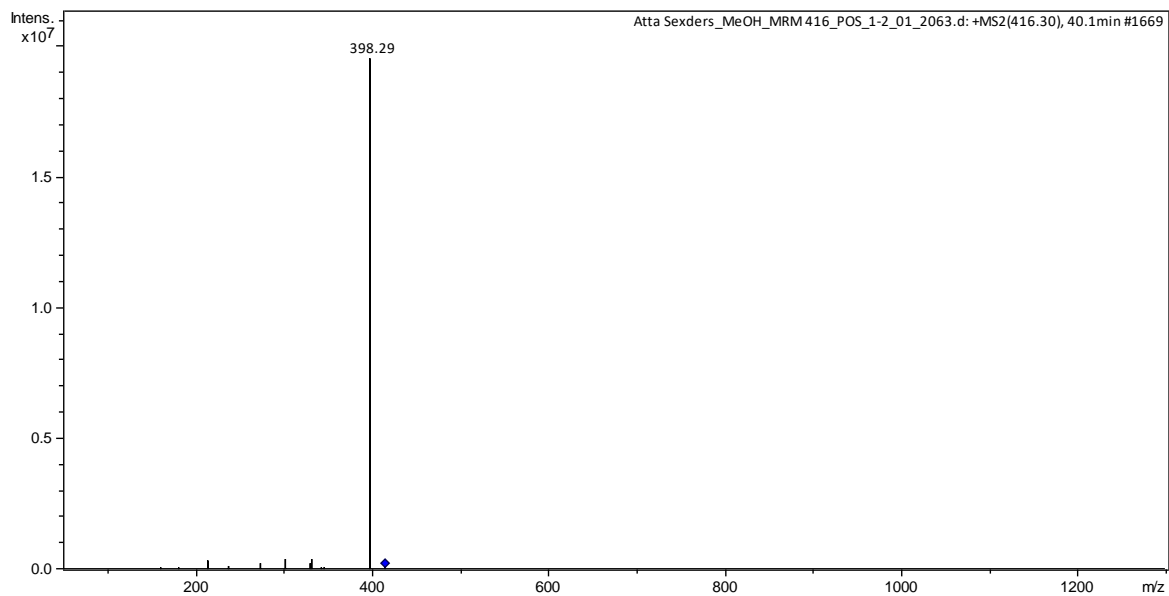

Supplement: pntd.0007643.s022.pdf [file pntd.0007643.s022.pdf]
